# Supplementary material
Source: PubMed Central journal article supplement (PMC5597829)
Supplement: rspb20171054supp1.pdf [file rspb20171054supp1.pdf]

## Supplementary Figures and Tables

Bayet, Quinn, Laboissière, Caldara, Lee, & Pascalis. Fearful but not Happy Expressions Boost Face Detection in Human Infants. *Proceedings of the Royal Society B: Biological Sciences*. doi: 10.1098/rspb.2017.1054

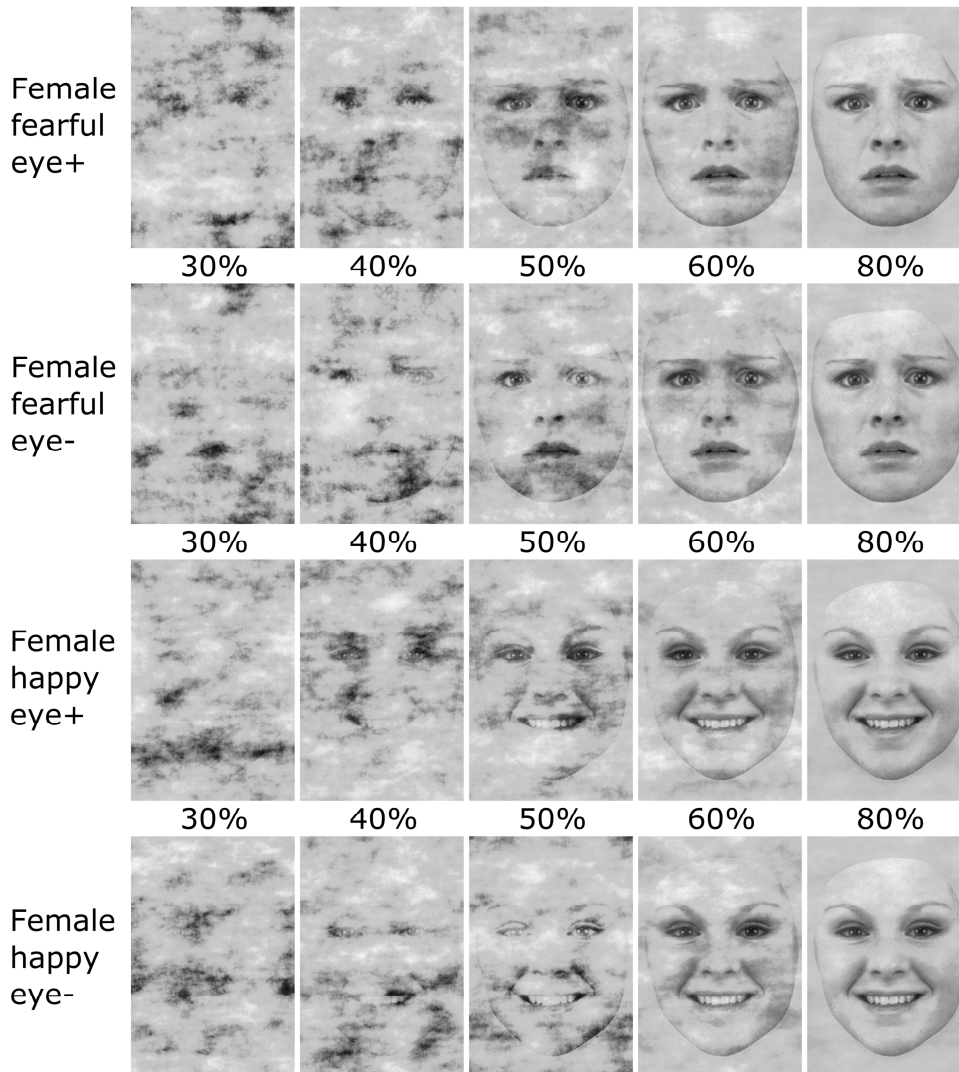

*Supplementary Figure 1.* Example stimuli at 30-80% signal level, in different experimental conditions: fearful or happy, more visible eyes (eye+) or less visible eyes (eye-). Stimuli were gamma-corrected before display (not shown). Original stimulus was distributed as part of the Karolinska Directed Emotional Faces database [1], whose copyright holder is: Karolinska Institutet, Department of Clinical Neuroscience, Section of Psychology, Stockholm, Sweden.

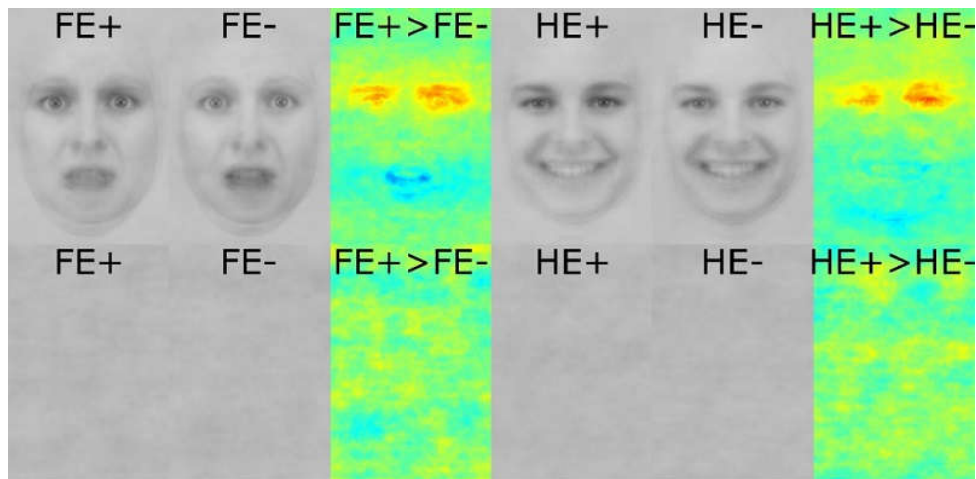

*Supplementary Figure 2.* Average face (top) and pure noise (bottom) stimuli. Averages taken from all trials with face signal levels 30-80% for conditions Fearful eye+ (FE+), Fearful eye- (FE-), Happy eye+ (HE+), and Happy eye- (HE-).

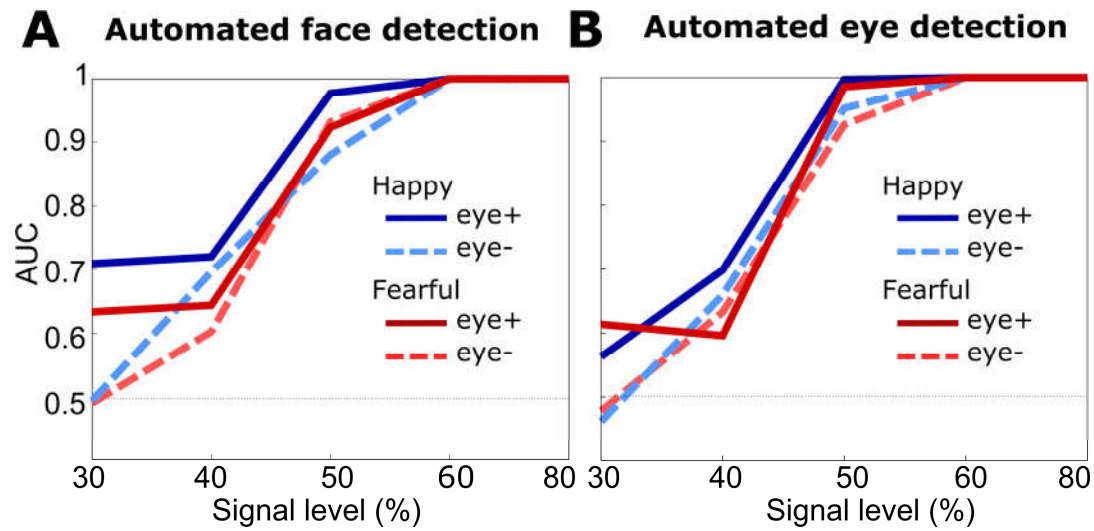

*Supplementary Figure 3. Control analysis: Automated detection of face and eyes. Automated (A) face and (B) eye detection [2] applied to all face-noise stimulus pairs. AUC, Area Under the Curve. Chance level is 0.5, an AUC of 1 indicates perfect performance.*

Supplementary Table 1

*Summary Statistics of Signal Quantity in Eye+ and Eye- Stimuli*

| Measure   | Eye visibility | mean  | median | min   | max   | $F(1,959)$ | $p$      |
|-----------|----------------|-------|--------|-------|-------|------------|----------|
| SSIM face | eye+           | 0.77  | 0.76   | 0.55  | 0.98  | 0.66       | 0.415 NS |
|           | eye-           | 0.77  | 0.75   | 0.53  | 0.98  |            |          |
| PSNR face | eye+           | 23.41 | 21.16  | 15.89 | 35.75 | 0.33       | 0.564 NS |
|           | eye-           | 23.18 | 21.08  | 15.00 | 35.66 |            |          |
| SSIM eyes | eye+           | 0.75  | 0.78   | 0.34  | 0.99  | 4.67       | 0.031 *  |
|           | eye-           | 0.73  | 0.74   | 0.26  | 0.99  |            |          |
| PSNR eyes | eye+           | 19.53 | 17.00  | 9.95  | 34.60 | 23.46      | <0.001 * |
|           | eye-           | 17.24 | 14.60  | 7.91  | 33.03 |            |          |

$F$ -statistics and  $p$ -values provided for the effect of eye visibility manipulation (eye+ versus eye-) on each measure of signal.

Supplementary Table 2

*Multivariate Prediction of the Face Side from Infant Looking Behavior*

| Predictor                                    | $\beta$ | $SE$ | $t$    | $p$     |
|----------------------------------------------|---------|------|--------|---------|
| Intercept                                    | 0.04    | 0.09 | 0.48   | 0.629   |
| PTLT to the left side *                      | - 1.09  | 0.16 | - 6.70 | < 0.001 |
| Duration of first look to the left side *    | - 0.28  | 0.14 | - 2.01 | 0.044   |
| Duration of first look to the right side *   | 0.59    | 0.13 | 4.68   | < 0.001 |
| Median duration of looks to the left side *  | - 0.63  | 0.15 | - 4.10 | < 0.001 |
| Median duration of looks to the right side * | 0.47    | 0.14 | 3.34   | 0.001   |

*Note.* The side of the face was coded as 0 (left) or 1 (right) and predicted by the infant's looking behavior using logistic regression. Three additional measures (number of looks to the right side, number of looks to the left side, and direction of first look) were rejected during forward feature selection and are not included in the table. Degrees of freedom in the error: 1037. Significant predictors of the face side ( $\alpha = 5\%$ ) are marked by an asterisk. The intercept is not statistically distinguishable from 0, reflecting the fact that the side of presentation of the face was counterbalanced across trials. See also Figure 2 in the main paper.

Supplementary Table 3

*Psychometric Curve Modeling of Face versus Noise Visual Preference: Fearful eye+ versus Others*

| Parameter                                   | Notation   | $\beta$ | SE   | $t$    | 2.5% CI | 97.5% CI |
|---------------------------------------------|------------|---------|------|--------|---------|----------|
| Asymptote at 0% signal                      | $Y_0$      | 0.01    | 0.09 | 0.07   | - 0.165 | 0.178    |
| Asymptote at 100% signal: Fearful *         | $Y_F$      | 1.25    | 0.08 | 15.76  | 1.091   | 1.401    |
| Asymptote at 100% signal: Happy vs. Fearful | $dY_H$     | - 0.13  | 0.10 | - 1.25 | - 0.332 | 0.073    |
| Slope *                                     | $a$        | 26.53   | 8.41 | 3.15   | 10.039  | 43.014   |
| Threshold: Fearful eye+ *                   | $x_{0FE}$  | 0.44    | 0.02 | 22.49  | 0.405   | 0.483    |
| Threshold: Happy eye- vs. Fearful eye+ *    | $dx_{0HM}$ | 0.05    | 0.03 | 1.99   | 0.001   | 0.103    |
| Threshold: Fearful eye- vs. Fearful eye+    | $dx_{0FM}$ | 0.01    | 0.03 | 0.48   | - 0.039 | 0.064    |
| Threshold: Happy eye+ vs. Fearful eye+      | $dx_{0HE}$ | 0.00    | 0.03 | 0.08   | - 0.055 | 0.060    |

*Note.* The logit-transformed visual preference for the face side was fitted as a function of signal level with a standard psychometric curve formula. Parameters significantly different from 0 (Wald confidence intervals,  $\alpha = 5\%$ ) are marked by an asterisk. Notations refer to the model equation (see Method). See also Figure 4.

Supplementary Table 4

*Psychometric Curve Modeling of Multivariate Face versus Noise Discrimination: Fearful eye+ versus Others*

| Parameter                                   | Notation   | $\beta$ | SE    | $t$    | 2.5% CI | 97.5% CI |
|---------------------------------------------|------------|---------|-------|--------|---------|----------|
| Asymptote at 0% signal *                    | $Y_0$      | 0.39    | 0.11  | 3.49   | 0.173   | 0.617    |
| Asymptote at 100% signal: Fearful *         | $Y_F$      | 2.09    | 0.11  | 19.12  | 1.873   | 2.301    |
| Asymptote at 100% signal: Happy vs. Fearful | $dY_H$     | 0.00    | 0.15  | 0.01   | -0.301  | 0.303    |
| Slope *                                     | $a$        | 36.70   | 15.31 | 2.40   | 6.690   | 66.714   |
| Threshold: Fearful eye+ *                   | $x_{0FE}$  | 0.44    | 0.02  | 20.56  | 0.399   | 0.483    |
| Threshold: Happy eye- vs. Fearful eye+ *    | $dx_{0HM}$ | 0.08    | 0.03  | 3.14   | 0.030   | 0.128    |
| Threshold: Fearful eye- vs. Fearful eye+    | $dx_{0FM}$ | - 0.01  | 0.03  | - 0.20 | - 0.058 | 0.048    |
| Threshold: Happy eye+ vs. Fearful eye+      | $dx_{0HE}$ | 0.04    | 0.03  | 1.16   | - 0.026 | 0.100    |

*Note.* Face versus noise discrimination evidences (correct log-odds) were fitted with a standard psychometric curve formula. Parameters significantly different from 0 (Wald confidence intervals,  $\alpha = 5\%$ ) are marked by an asterisk. Notations refer to the model equation (see Method). See also Figure 4 and Supplementary Tables 5, 7.

Supplementary Table 5

*Psychometric Curve Modeling of Face versus Noise Visual Preference: Fearful eye- versus Others*

| Parameter                                   | $\beta$ | $SE$ | $t$    | 2.5% $CI$ | 97.5% $CI$ |
|---------------------------------------------|---------|------|--------|-----------|------------|
| Asymptote at 0% signal                      | 0.02    | 0.08 | 0.27   | - 0.138   | 0.182      |
| Asymptote at 100% signal: Fearful *         | 1.22    | 0.08 | 15.80  | 1.069     | 1.372      |
| Asymptote at 100% signal: Happy vs. Fearful | - 0.13  | 0.10 | - 1.28 | - 0.332   | 0.070      |
| Slope *                                     | 28.72   | 9.05 | 3.17   | 10.980    | 46.455     |
| Threshold: Fearful eye- *                   | 0.46    | 0.02 | 19.90  | 0.417     | 0.508      |
| Threshold: Happy eye- vs. Fearful eye-      | 0.03    | 0.03 | 1.18   | -0.022    | 0.087      |
| Threshold: Fearful eye+ vs. Fearful eye-    | -0.02   | 0.03 | -0.58  | - 0.069   | 0.037      |
| Threshold: Happy eye+ vs. Fearful eye-      | -0.02   | 0.03 | -0.73  | - 0.087   | 0.040      |

*Note.* The logit-transformed visual preference for the face side was fitted as a function of signal level with a standard psychometric curve formula. Parameters significantly different from 0 (Wald confidence intervals,  $\alpha = 5\%$ ) are marked by an asterisk. See also Figure 4 and Supplementary Tables 2, 6.

Supplementary Table 6

*Psychometric Curve Modeling of Multivariate Face versus Noise Discrimination: Fearful eye- versus Others*

| Parameter                                   | $\beta$ | SE    | $t$   | 2.5% CI | 97.5% CI |
|---------------------------------------------|---------|-------|-------|---------|----------|
| Asymptote at 0% signal *                    | 0.39    | 0.12  | 3.39  | 0.166   | 0.62     |
| Asymptote at 100% signal: Fearful *         | 2.09    | 0.11  | 18.94 | 1.874   | 2.306    |
| Asymptote at 100% signal: Happy vs. Fearful | -0.00   | 0.16  | -0.00 | -0.305  | 0.304    |
| Slope *                                     | 36.12   | 14.96 | 2.41  | 6.795   | 65.438   |
| Threshold: Fearful eye- *                   | 0.44    | 0.02  | 20.26 | 0.394   | 0.478    |
| Threshold: Happy eye- vs. Fearful eye- *    | 0.08    | 0.03  | 3.28  | 0.034   | 0.133    |
| Threshold: Fearful eye+ vs. Fearful eye-    | 0.01    | 0.03  | 0.21  | - 0.047 | 0.059    |
| Threshold: Happy eye+ vs. Fearful eye-      | 0.04    | 0.03  | 1.31  | - 0.021 | 0.106    |

*Note.* Face versus noise discrimination evidences (correct log-odds) were fitted with a standard psychometric curve formula. Parameters significantly different from 0 (Wald confidence intervals,  $\alpha = 5\%$ ) are marked by an asterisk. See also Figure 4 and Supplementary Tables 3, 7.

Supplementary Table 7

*Psychometric Curve Modeling of Face versus Noise Visual Preference: Happy eye+ versus Others*

| Parameter                                   | $\beta$ | SE    | $t$    | 2.5% CI | 97.5% CI |
|---------------------------------------------|---------|-------|--------|---------|----------|
| Asymptote at 0% signal                      | 0.03    | 0.08  | 0.43   | - 0.121 | 0.189    |
| Asymptote at 100% signal: Fearful *         | 1.22    | 0.08  | 15.87  | 1.070   | 1.372    |
| Asymptote at 100% signal: Happy vs. Fearful | - 0.13  | 0.10  | - 1.27 | - 0.328 | 0.070    |
| Slope *                                     | 30.67   | 10.56 | 2.90   | 9.970   | 51.362   |
| Threshold: Happy eye+ *                     | 0.44    | 0.02  | 18.00  | 0.388   | 0.483    |
| Threshold: Fearful eye- vs. Happy eye+      | 0.03    | 0.03  | 0.92   | -0.035  | 0.096    |
| Threshold: Fearful eye+ vs. Happy eye+      | 0.01    | 0.03  | 0.44   | - 0.046 | 0.073    |
| Threshold: Happy eye- vs. Happy eye+ *      | 0.06    | 0.03  | 2.22   | 0.008   | 0.120    |

*Note.* The logit-transformed visual preference for the face side was fitted as a function of signal level with a standard psychometric curve formula. Parameters significantly different from 0 (Wald confidence intervals,  $\alpha = 5\%$ ) are marked by an asterisk. See also Figure 4 and Supplementary Tables 2, 4.

Supplementary Table 8

*Psychometric Curve Modeling of Multivariate Face versus Noise Discrimination: Happy eye+ versus Others*

| Parameter                                   | $\beta$ | SE    | $t$   | 2.5% CI | 97.5% CI |
|---------------------------------------------|---------|-------|-------|---------|----------|
| Asymptote at 0% signal *                    | 0.39    | 0.12  | 3.41  | 0.167   | 0.620    |
| Asymptote at 100% signal: Fearful *         | 2.09    | 0.11  | 19.01 | 1.875   | 2.305    |
| Asymptote at 100% signal: Happy vs. Fearful | -0.00   | 0.16  | -0.00 | -0.305  | 0.304    |
| Slope *                                     | 36.12   | 14.71 | 2.46  | 7.279   | 64.951   |
| Threshold: Happy eye+ *                     | 0.48    | 0.02  | 20.53 | 0.433   | 0.524    |
| Threshold: Fearful eye- vs. Happy eye+      | -0.04   | 0.03  | -1.32 | -0.105  | 0.021    |
| Threshold: Fearful eye+ vs. Happy eye+      | -0.04   | 0.03  | -1.16 | -0.099  | 0.025    |
| Threshold: Happy eye- vs. Happy eye+        | 0.04    | 0.03  | 1.58  | -0.010  | 0.092    |

*Note.* Face versus noise discrimination evidences (correct log-odds) were fitted with a standard psychometric curve formula. Parameters significantly different from 0 (Wald confidence intervals,  $\alpha = 5\%$ ) are marked by an asterisk. See also Figure 4, and Supplementary Tables 3, 5.

## References

1. Lundqvist, D., Flykt, A. & Öhman, A. 1998 The Karolinska directed emotional faces. *Stock. Sweden Karolinska Inst.*
2. Viola, P. & Jones, M. 2001 Rapid object detection using a boosted cascade of simple features. In *Conference on Computer Vision and Pattern Recognition (CVPR)*, (doi:10.1109/CVPR.2001.990517)
